# Supplementary material for: Atomically precise growth of sodium titanates as anode materials for high-rate and ultralong cycle-life sodium-ion batteries
Source: Royal Society of Chemistry journal article supplement (doi:10.1039/c5ta08435k), 2015-01-01
Supplement: c5ta08435k1.pdf [file c5ta08435k1.pdf]

**Electronic Supplementary Material (EIS) for**

**Atomically Precise Growth of Sodium Titanates as Anode Materials for High-Rate  
and Ultralong Cycle-Life Sodium-Ion Batteries**

*Jian Liu,<sup>a,b</sup> Mohammad N. Banis,<sup>a</sup> Biwei Xiao,<sup>a</sup> Qian Sun,<sup>a</sup> Andrew Lushington,<sup>a</sup> Ruying Li,<sup>a</sup>  
Jinghua Guo,<sup>b</sup> Tsun-Kong Sham,<sup>c</sup> and Xueliang Sun<sup>a,\*</sup>*

<sup>a</sup> Department of Mechanical and Materials Engineering, University of Western Ontario, London,  
Ontario N6A 5B9, Canada

<sup>b</sup> Advanced Light Source, Lawrence Berkeley National Laboratory, Berkeley, California 94720,  
United State

<sup>c</sup> Department of Chemistry, University of Western Ontario, London, Ontario N6A 5B7, Canada

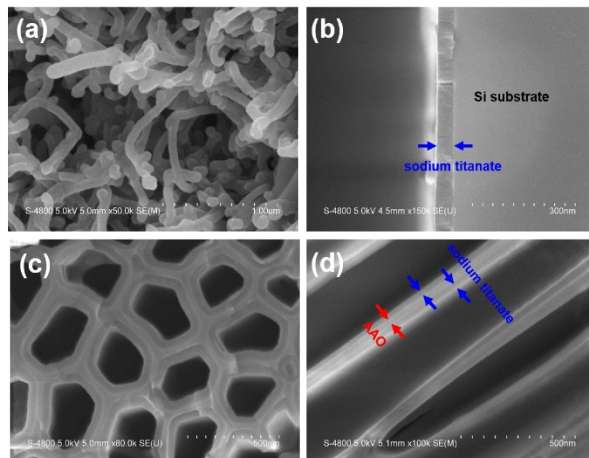

**Fig. S1.** Low-magnification SEM images of sodium titanate thin films deposited on (a) nitrogen-doped CNTs using 200 cycles, (b) Si (100) wafer using 400 cycles, and (c,d) AAO template using 200 cycles (top and cross-section views). The deposition was performed at 250 °C using ALD recipe of (NaO<sup>t</sup>Bu-H<sub>2</sub>O) + (TTIP-H<sub>2</sub>O).

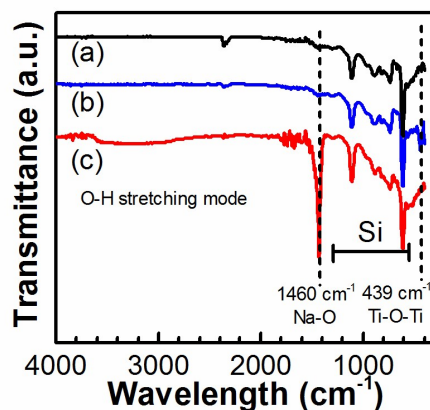

**Fig. S2.** FTIR spectra of (a) bare double-side polished Si wafer, (b) anatase TiO<sub>2</sub> deposited by ALD at 225 °C, and (c) sodium titanate deposited by ALD at 225 °C on double-side polished Si wafer. The sharp peak located at 1460 cm<sup>-1</sup> in (c) is attributable to the formation of Na-O bonds in the sodium titanate films [1]. The peak centered at 439 cm<sup>-1</sup> in (b) is ascribed to Ti-O-Ti bonds typically observed in anatase TiO<sub>2</sub> [2]. Disappearance of 439 cm<sup>-1</sup> peak in (c) indicates the breaking of Ti-O-Ti bonds and formation of Na-O-Ti bonds in the sodium titanate films. Peaks from 605 cm<sup>-1</sup> to 1105 cm<sup>-1</sup> result from double-side polished Si wafer.

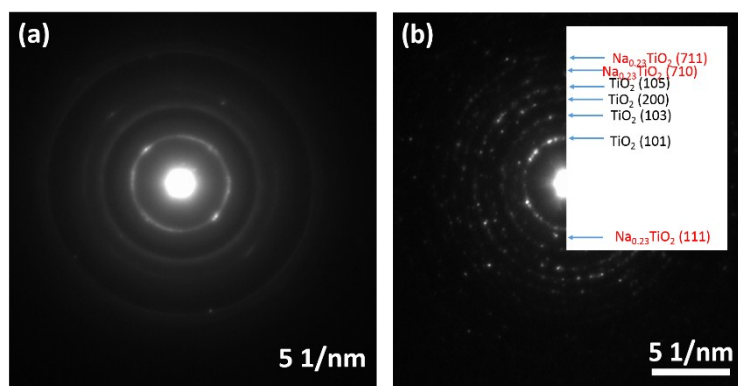

**Fig. S3.** Selected-area electron diffraction (SAED) patterns of (a) sodium titanates as-deposited on CNTs at 225 °C, and (b) sodium titanates/CNTs annealed at 500 °C in air.

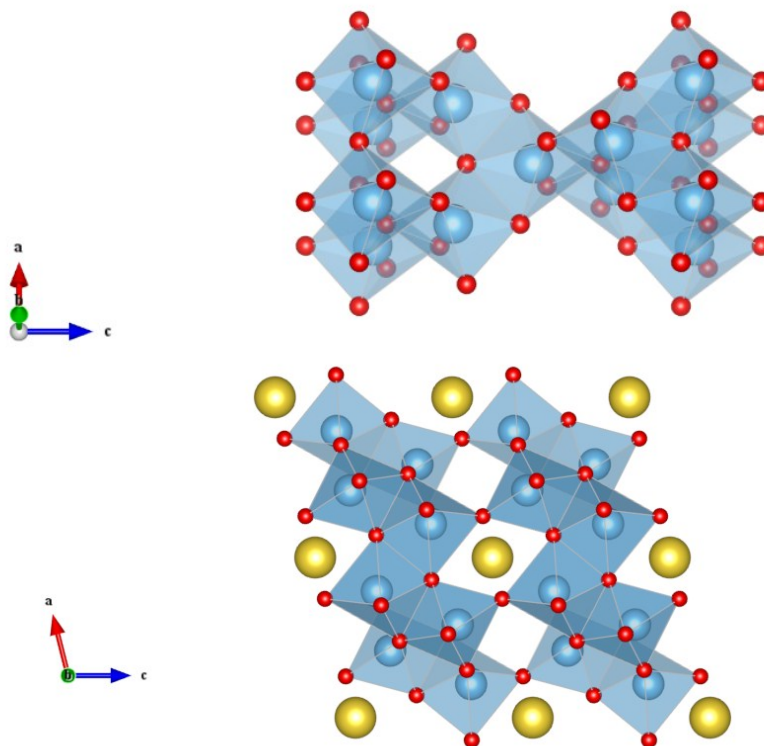

**Fig. S4.** Crystal structure of anatase  $\text{TiO}_2$  (top) and  $\text{Na}_{0.23}\text{TiO}_2$  (bottom) viewed along the  $b$ -axis. Red spheres represent oxygen, blue spheres represents titanium ions, yellow spheres represent sodium ions, and blue polyhedrons represent the Ti – O octahedra.

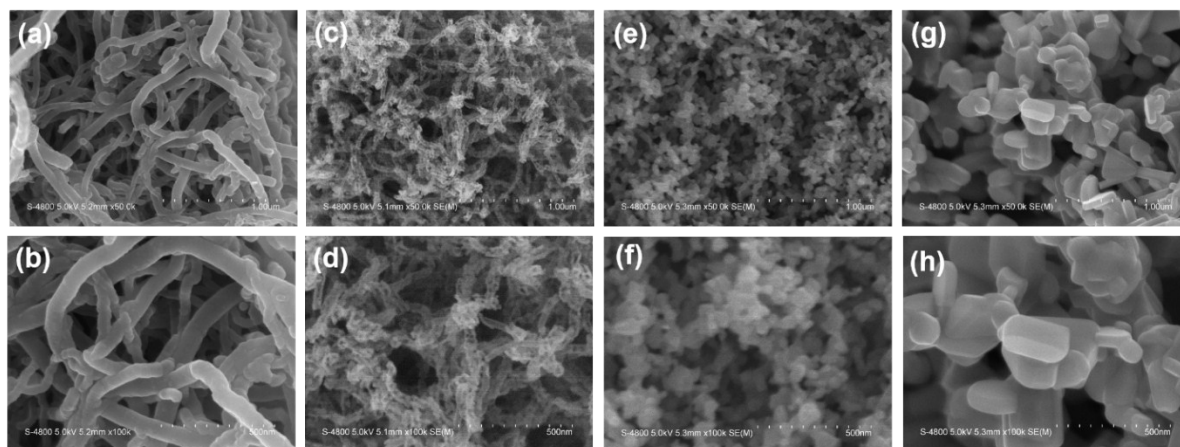

**Fig. S5.** SEM images of sodium titanates (a,b) as-deposited at 225 °C, after annealing in air at (c,d) 500 °C, (e,f) 700 °C, and (g,h) 900 °C, respectively.

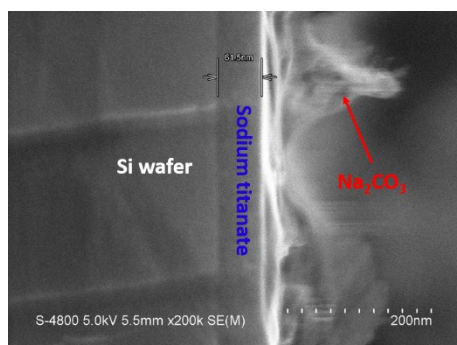

**Fig. S6.** Cross-section SEM image of sodium titanates deposited on Si wafer at 275 °C using 400 ALD cycles.

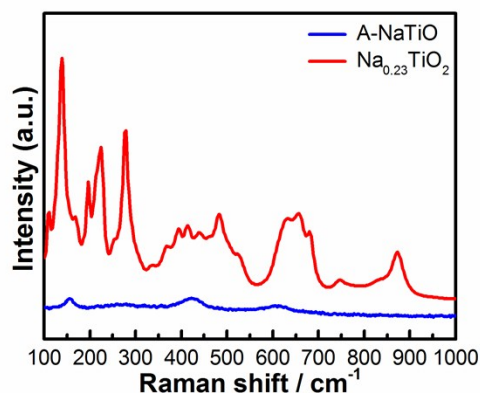

**Fig. S7.** Raman spectra of A-NaTiO and  $\text{Na}_{0.23}\text{TiO}_2$ . Raman bands below  $278\text{ cm}^{-1}$  can be assigned to lattice modes and Na-O-Ti stretching vibration modes [3]; Raman bands between  $370$  and  $484\text{ cm}^{-1}$  can be assigned to framework of Ti-O-Ti vibrations [4]; Raman bands between  $632$  and  $683\text{ cm}^{-1}$  are due to the Ti-O-Ti stretch in edge-shared  $\text{TiO}_6$  [1, 3-5]; Raman band at  $873\text{ cm}^{-1}$  can be assigned to the symmetric stretch of short Ti-O bonds involving non-bridging oxygen atoms associated with sodium ions [1,4,5].

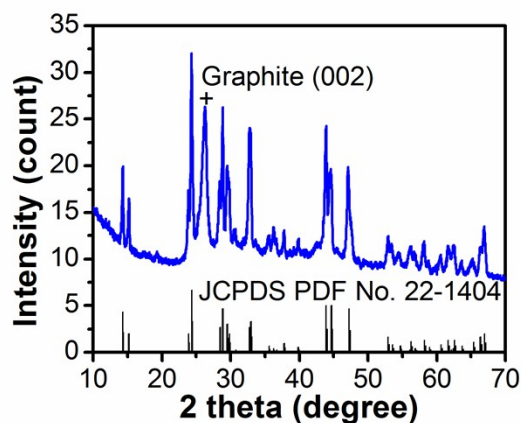

**Fig. S8.** XRD pattern of  $\text{Na}_{0.23}\text{TiO}_2/\text{CNT}$  composite prepared by annealing amorphous sodium titanates in argon gas for 10h.

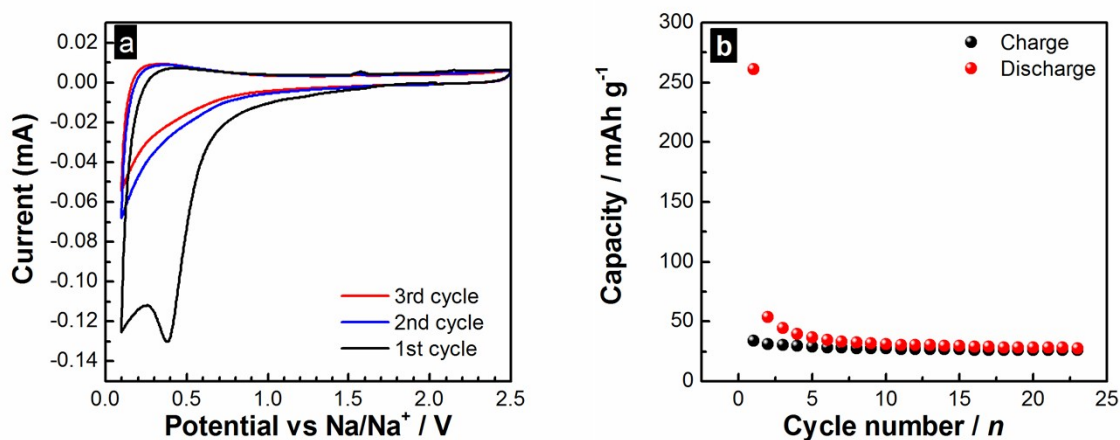

**Fig. S9.** (a) CV curve of pristine CNTs measured between 0.1 to 2.5V at a scanning rate of 0.1 mV s<sup>-1</sup>; and (b) cycling performance of pristine CNTs at a current rate of 10 mA g<sup>-1</sup>.

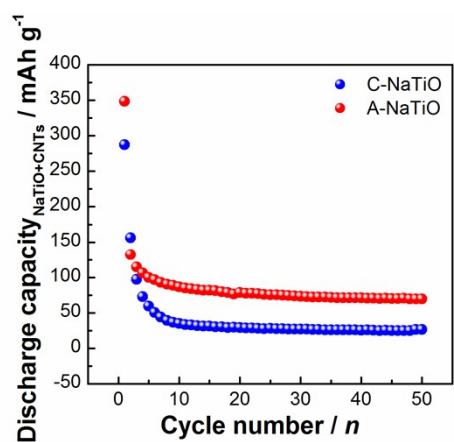

**Fig. S10.** Discharge capacity of A-NaTiO/CNT and C-NaTiO/CNT composites at a current rate of 10 mA g<sup>-1</sup>.

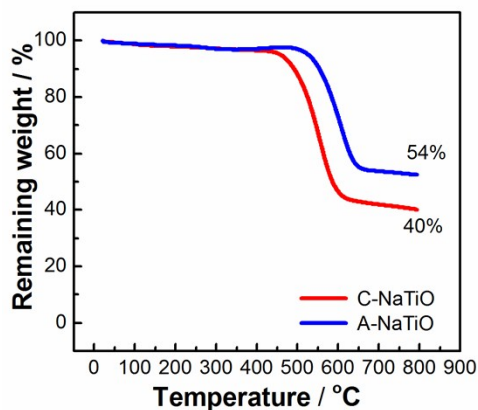

**Fig. S11.** TG results of A-NaTiO and C-NaTiO on CNTs as measured in air atmosphere at a heating rate of  $30\text{ }^{\circ}\text{ min}^{-1}$ .

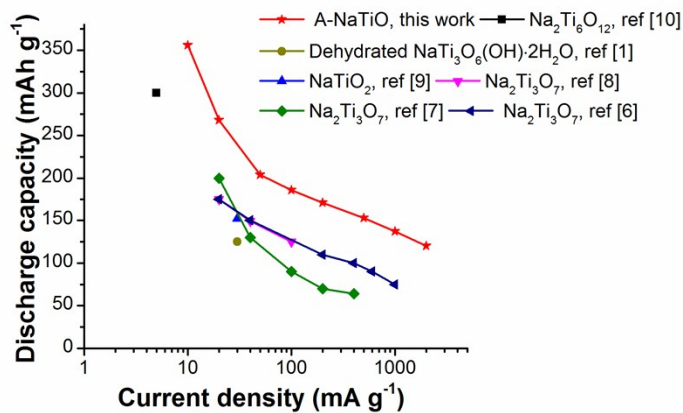

**Fig. S12.** Rate capability of A-NaTiO in this work in comparison with other types of sodium titanates reported in reference [1, 6-10]. At each current density, the discharge capacity of each sample was taken at the second cycle for comparison.

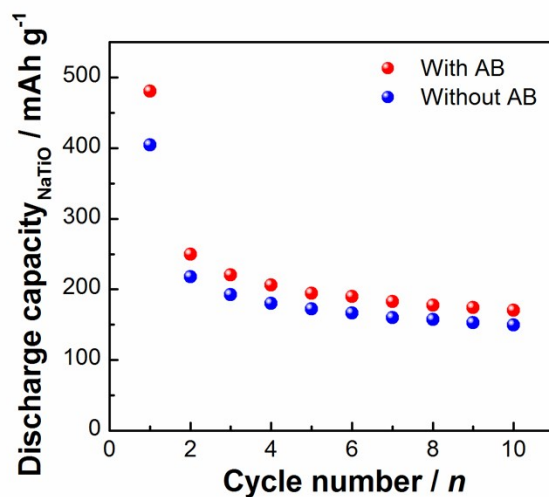

**Fig. S13.** Cycling stability of A-NaTiO/CNT electrodes prepared with acetylene black (AB) (A-NaTiO/CNTs:PVDF:AB = 8:1:1) and without AB (NaTiO/CNTs:PVDF = 9:1) at a current density of 10 mA g<sup>-1</sup>.

## References

- 1 M. Shirpour, J. Cabana and M. Doeff, *Energy Environ. Sci.* 2013, **6**, 2538-2547.
- 2 P. Vitanov, A. Harizanova and T. Ivanova, *J. Phys. Conf. Ser.* 2012, **356**, 012041.
- 3 B. C. Viana, O. P. Ferreira, A. G. Souza Filho, J. M. Filho and O. L. Alves, *J. Braz. Chem. Soc.* 2009, **20**, 167-175.
- 4 Z. Zhang, J. B. M. Goodall, S. Brown, L. Karlsson, R. J. H. Clark, J. L. Hutchison, I. U. Rehman and J. A. Darr, *Dalton Trans.* 2010, **39**, 711-714.
- 5 T. Gao, H. Fjellvåg and P. Norby, *Inorg. Chem.* 2009, **48**, 1423-1432.
- 6 A. Rudola, K. Saravanan, C. W. Mason and P. Balaya, *J. Mater. Chem. A* **2013**, *1*, 2653-2662.



- 7 H. Pan, X. Lu, X. Yu, Y.-S. Hu, H. Li, X.-Q. Yang and L. Chen, *Adv. Energy Mater.* **2013**, 3, 1186-1194.
- 8 W. Wang, C. Yu, Y. Liu, J. Hou, H. Zhu and S. Jiao, *RSC Adv.* **2013**, 3, 1041-1044.
- 9 S. Wu, X. Li, B. Xu, N. Twu, L. Liu, and G. Ceder, *Energy Environ. Sci.* **2015**, 8, 195-202.
- 10 K. Shen and M. Wagemaker, *Inorg. Chem.* **2014**, 53, 8250-8256.
